# Supplementary material for: Vaginal lubricants in the couple trying-to-conceive: Assessing healthcare professional recommendations and effect on in vitro sperm function
Source: PLOS journal article supplement (doi:10.1371/journal.pone.0209950), 2019-05-14
Supplement: S1 (10.1371/journal.pone.0209950.s001) [file journal.pone.0209950.s001]

## Healthcare Professional Survey

**Q1. Please indicate your role.**

- A. Doctor
- B. Nurse

**Q2. How often do you bring up the issue of vaginal dryness when you see couples who are trying to conceive?**

- A. Always
- B. Often
- C. Sometimes
- D. Rarely
- E. Never

**Q3. How often do you ask about lubricant use in couples trying to conceive?**

- A. Always
- B. Often
- C. Sometimes
- D. Rarely
- E. Never

**Q4. Would you recommend a vaginal lubricant for a couple trying to conceive?**

- A. Yes
- B. No

**Q4a. Please provide a reason for your choice.**

**Q5. Which lubricant would you recommend for a couple trying to conceive?**

- A. I would not recommend a lubricant
- B. Any lubricant
- C. Any lubricant marketed as nonspermicidal

**Q5a. If you would recommend a lubricant, please provide further details.**

**Q6. Are you aware of any local or national guidance on lubricant recommendations for couples trying to conceive? (please circle one)**

- A. Yes
- B. No

**Q6a. If yes, please specify below.**

**Q7. Have you ever prescribed a particular lubricant for a couple trying to conceive?**

- A. Yes
- B. No

**Q7a. If yes, which lubricant have you previously prescribed? (detail below)**

**Q8. To what extent do you agree with the following statement: “Lubricants marketed for fertility patients can have an impact on sperm function”.**

- A. Strongly agree
- B. Agree
- C. Neither agree nor disagree
- D. Disagree
- E. Strongly disagree

**Q9. Which of the following best describes a lubricant with the classification “nonspermicidal”?**

- A. A lubricant that is safe for sperm
- B. A lubricant that will not kill sperm
- C. A lubricant that will not harm sperm
- D. A lubricant that contains no drug known to kill sperm

**Thank you for participating.**
